# Supplementary material for: Metabolomic Studies of Tissue Injury in Nonhuman Primates Exposed to Gamma-Radiation
Source: MDPI journal article supplement (doi:10.3390/ijms20133360), 2019-07-09
Supplement: s1 [file s1]

Supplementary table 2. Metabolites

\*ANOVA results portray FDR adjusted p-value

\*Binary cor

| Metabolites                                                | ANOVA  |
|------------------------------------------------------------|--------|
| 3-Hydroxy-5-phenylpentanoic acid                           | 0.0205 |
| Xanthurenic Acid                                           |        |
| N-lactoyl-Phenylalanine                                    |        |
| Abu-Gly-OH                                                 |        |
| 1-hexadecanoyl-sn—glycerol-3-phosphor-D-myo-inositol       |        |
| 6-O-(1-O-stearoyl-sn-glycerol-3-phosphono)-1D-myo-inositol |        |
| Choline                                                    |        |
| Glutamate                                                  |        |
| Xanthine                                                   |        |
| Carnitine                                                  |        |
| 1,2-Dihydronaphthalene-1,2-diol                            |        |
| Phenylpyruvic acid                                         |        |
| Phenylalanine                                              |        |
| Valero-1,5-lactam                                          |        |
| Choline Sulfate                                            | 0.0472 |
| 10-Oxo-8-decenoic acid                                     |        |
| 3-amino-2-naphthoic acid                                   |        |
| N6,N6,N6-Trimethyl-L-Lysine                                |        |
| Acetylcarnitine                                            |        |
| (+)-propionylcarnitine                                     |        |
| 6,8,10,12-pentadecatetraenal                               |        |
| pro ile                                                    |        |
| isobutrylcarnitine                                         |        |
| 2-methylbutroylcarnitine                                   |        |
| palmitoleamide                                             |        |
| Glycerophosphocholine                                      |        |
| 3-carboxy-4-methyl-5-pentyl-2-furanpropanoic acid          |        |
| C16 Sphinganine                                            |        |
| Gamma-glutamylglutamic acid                                |        |
| Oleamide                                                   |        |
| Stearamide                                                 |        |
| 12,13 EpOME                                                |        |
| Palmitic amide                                             |        |
| Sphinganine                                                |        |
| Eicosapentaenoic acid                                      |        |
| 3-oxo-nonadecanoic acid                                    |        |
| (4,7,10,13,16,19)-docosa-4,7,10,13,16,19-hexanoic acid     |        |
| 13-Docosenamide                                            |        |
| 2-oxo-heneicosanoic acid                                   |        |
| Adenosine 3'-monophosphate                                 |        |
| O-Arachidonoyl Glycidol (2AG)                              |        |

Linoleyl carnitine (C18:2)

C18:1

Stearoylcarnitine (C18:0)

Butyl 4'-O-butanoyl-6-O-hexadecanoyl-neohesperidoside

nparison results portray FDR adjusted p-valuse (fold change)

| Lung          |      |               | Lung   |     |      |      |        |
|---------------|------|---------------|--------|-----|------|------|--------|
| HvS           | HvNS | SvNS          | ANOVA  | HvS | HvNS | SvNS | ANOVA  |
|               |      |               |        |     |      |      | 0.0038 |
|               |      |               |        |     |      |      | 0.0038 |
| 0.05 (↑3.09)  |      |               |        |     |      |      |        |
| 0.026 (↓0.26) |      |               |        |     |      |      |        |
|               |      |               |        |     |      |      | 0.0039 |
|               |      |               |        |     |      |      | 0.0053 |
|               |      |               |        |     |      |      | 0.0137 |
|               |      |               |        |     |      |      | 0.0059 |
|               |      |               |        |     |      |      | 0.0053 |
|               |      |               | 0.0472 |     |      |      | 0.0362 |
|               |      |               |        |     |      |      | 0.0337 |
|               |      |               |        |     |      |      | 0.0091 |
|               |      |               |        |     |      |      | 0.0053 |
|               |      |               |        |     |      |      | 0.037  |
|               |      | 0.032 (↑2.42) |        |     |      |      | 0.0053 |
|               |      |               |        |     |      |      | 0.0084 |
|               |      |               |        |     |      |      | 0.0039 |
|               |      |               |        |     |      |      | 0.0056 |
|               |      |               |        |     |      |      | 0.0084 |
|               |      |               |        |     |      |      | 0.0421 |
|               |      |               |        |     |      |      | 0.0053 |
|               |      |               |        |     |      |      | 0.0053 |
|               |      |               |        |     |      |      | 0.0058 |
|               |      |               |        |     |      |      | 0.0053 |
|               |      |               |        |     |      |      | 0.0053 |
|               |      |               |        |     |      |      | 0.0088 |
|               |      |               |        |     |      |      | 0.0143 |
|               |      |               |        |     |      |      | 0.0053 |

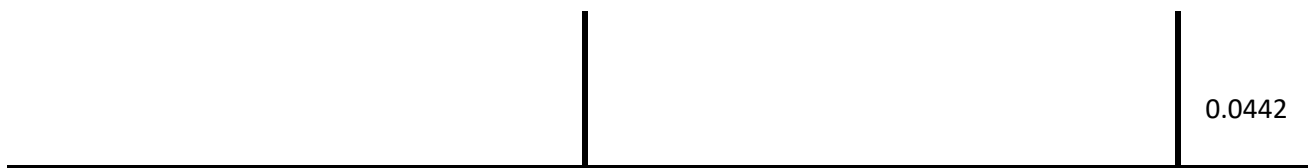

| Kidney        |               |               | Liver  |              |               |               |
|---------------|---------------|---------------|--------|--------------|---------------|---------------|
| HvS           | HvNS          | SvNS          | ANOVA  | HvS          | HvNS          | SvNS          |
| 0.005 (↓0.55) | 0.01 (↓0.51)  |               | 0.0153 |              |               |               |
| 0.005 (↓0.56) | 0.01 (↓0.5)   |               |        |              |               |               |
| 0.038 (↓0.73) | 0.041 (↓0.7)  |               | 0.0105 |              |               | 0.007 (↑1.72) |
| 0.017 (↓0.45) | 0.003 (↓0.35) |               | 0.004  |              |               | 0.003 (↑2.07) |
| 0.017 (↓0.6)  | 0.003 (↓0.5)  |               |        |              |               |               |
| 0.046 (↑1.6)  |               |               |        |              |               |               |
| 0.018 (↑1.66) | 0.011 (↑1.78) |               |        |              |               |               |
| 0.018 (↓0.61) | 0.004 (↓0.52) |               | 0.0375 |              |               | 0.012 (↑1.96) |
| 0.017 (↓0.58) | 0.003 (↓0.51) |               |        |              |               | 0.045 (↑1.34) |
| 0.028 (↑1.44) | 0.036 (↑1.53) |               | 0.0064 |              | 0.049 (↑3)    | 0.044 (↑1.83) |
|               |               |               | 0.0051 | 0.02 (↓0.45) |               | 0.023 (↑1.63) |
|               |               |               |        |              |               | 0.043 (↑1.8)  |
|               | 0.035 (↑3.04) |               | 0.0181 |              |               | 0.023 (↑3.96) |
| 0.017 (↓0.61) | 0.003 (↓0.51) |               | 0.0058 |              |               | 0.006 (↑1.96) |
|               |               |               | 0.004  |              |               | 0.007 (↑5.88) |
|               |               |               | 0.0029 |              | 0.027 (↑6.09) | 0.006 (↑4.08) |
| 0.023 (↓0.65) | 0.005 (↓0.57) |               |        |              |               | 0.03 (↑1.39)  |
|               | 0.003 (↑5.06) | 0.021 (↑4.74) | 0.0462 |              |               |               |
| 0.017 (↓0.57) | 0.005 (↓0.5)  |               |        |              |               | 0.046 (↑1.34) |
| 0.026 (↓0.68) | 0.005 (↓0.6)  |               |        |              |               | 0.037 (↑1.33) |
|               | 0.022 (↓0.74) |               | 0.0161 |              |               | 0.046 (↑2.11) |
| 0.017 (↓0.56) | 0.003 (↓0.49) |               |        |              |               | 0.048 (↑1.36) |
| 0.017 (↓0.59) | 0.003 (↓0.51) |               |        |              |               | 0.044 (↑1.35) |
| 0.018 (↓0.6)  | 0.004 (↓0.51) |               |        |              |               |               |
| 0.017 (↓0.57) | 0.003 (↓0.5)  |               |        |              |               | 0.049 (↑1.33) |
| 0.017 (↓0.6)  | 0.003 (↓0.52) |               | 0.046  |              |               |               |
|               | 0.005 (↓0.53) |               | 0.0042 |              |               | 0.006 (↑6.97) |
|               | 0.003 (↓0.54) |               | 0.0423 |              |               | 0.034 (↑1.52) |
| 0.017 (↓0.6)  | 0.003 (↓0.5)  |               | 0.009  |              | 0.027 (↑2.79) | 0.043 (↑1.69) |

|                             |        |               |
|-----------------------------|--------|---------------|
| 0.03 (↓0.34)                | 0.015  | 0.03 (↑3.44)  |
|                             | 0.0218 | 0.049 (↑6.73) |
| 0.025 (↓0.47)               | 0.0047 | 0.006 (↑4.17) |
| 0.037 (↓0.57) 0.047 (↓0.56) |        | 0.029 (↑1.49) |

| Spleen |              |      |               | Heart  |     |      |      |
|--------|--------------|------|---------------|--------|-----|------|------|
| ANOVA  | HvS          | HvNS | SvNS          | ANOVA  | HvS | HvNS | SvNS |
|        |              |      | 0.039 (↓0.62) | 0.0227 |     |      |      |
|        |              |      | 0.043 (↓0.39) |        |     |      |      |
| 0.0397 |              |      |               |        |     |      |      |
| 0.0174 | .029 (↑4.99) |      |               |        |     |      |      |

0.042 (↑2.93)
