# Supplementary material for: Metabolomic Studies of Tissue Injury in Nonhuman Primates Exposed to Gamma-Radiation
Source: MDPI journal article supplement (doi:10.3390/ijms20133360), 2019-07-09
Supplement: s1 [file s1]

\*ANOVA results portray FDR adjusted p-value

\*Binary comparison results portray FDR adjusted p-valuse (fold change)

| Metabolites                                               |                 | Jejunum |               |               | Lung  |       |      |        | Kidney        |               |               |        | Liver  |              |               | Spleen       |              |              |              | Heart |  |  |  |
|-----------------------------------------------------------|-----------------|---------|---------------|---------------|-------|-------|------|--------|---------------|---------------|---------------|--------|--------|--------------|---------------|--------------|--------------|--------------|--------------|-------|--|--|--|
|                                                           |                 | ANOVA   | HvS           | SvNS          | ANOVA | HvS   | HvNS | SvNS   | ANOVA         | HvS           | HvNS          | SvNS   | ANOVA  | HvS          | HvNS          | SvNS         | ANOVA        | HvS          | HvNS         | SvNS  |  |  |  |
| 6-O-(1-O-stearoyl-sn-glycero-3-phosphono)-1D-myo-inositol | PC(22:6/0:0)    | 0.019   |               |               |       |       |      |        |               |               | 0.047(↑1.74)  |        | 0.001  |              | 0.002(↑10.93) | 0.025(↑2.46) |              |              |              |       |  |  |  |
|                                                           | PC(14:0/18:0)   | 0.026   |               | 0.032 (↓2.91) |       |       |      |        | 0.009         | 0.017(↓0.59)  | 0.011(↓0.57)  |        | 0.02   |              |               | 0.007(↑1.78) |              |              |              |       |  |  |  |
|                                                           | SM(d18:1/16:0)  |         |               |               | 0.046 |       |      |        | 0.005         | 0.017(↓0.45)  | 0.003(↓0.47)  |        | 0.015  |              |               | 0.026(↑1.55) |              |              |              |       |  |  |  |
|                                                           | PC(22:6/22:6)   |         |               |               |       |       |      |        | 0.009         | 0.017(↓0.59)  | 0.018(↓0.61)  |        | 0.048  |              |               |              |              |              |              |       |  |  |  |
|                                                           | PC(18:2/20:4)   | 0.019   |               | 0.035 (↓1.71) | 0.046 |       |      |        |               |               |               |        | 0.024  |              |               | 0.031(↑1.72) | 0.011        |              | 0.011(↑1.92) | 0.034 |  |  |  |
|                                                           | PC(13:0/0:0)    |         |               |               |       |       |      |        | 0.038         | 0.022(↓0.41)  |               |        | 0.005  |              |               | 0.004(↑1.66) | 0.027        |              | 0.016(↑1.99) |       |  |  |  |
|                                                           | PC(P-15:0/0:0)  |         |               |               |       |       |      |        | 0.033         | 0.017(↓0.43)  |               |        | 0.017  |              |               | 0.011(↑3.31) |              |              |              |       |  |  |  |
|                                                           | PC(15:0/0:0)    |         |               |               |       |       |      |        | 0.005         | 0.017(↓0.29)  | 0.014(↓0.32)  |        | 0.014  |              |               | 0.01(↑4.26)  |              |              |              |       |  |  |  |
|                                                           | PC(O-18:2/2:0)  |         |               |               |       |       |      |        |               | 0.031(↓0.6)   |               |        | 0.042  |              |               | 0.016(↑1.71) |              |              |              |       |  |  |  |
|                                                           | SM(d18:1/14:0)  |         |               |               |       |       |      |        | 0.027         | 0.017(↓0.64)  |               |        |        |              |               |              |              |              |              |       |  |  |  |
|                                                           | PC(13:0/18:2)   |         |               |               |       |       |      |        | 0.026         | 0.025(↓0.61)  | 0.015(↓0.57)  |        | 0.048  |              |               | 0.046(↑1.62) |              |              |              |       |  |  |  |
|                                                           | PC(P-16:0/15:1) |         |               |               |       |       |      |        | 0.005         | 0.017(↓0.56)  | 0.003(↓0.49)  |        |        |              |               | 0.046(↑1.51) |              |              |              |       |  |  |  |
|                                                           | PC(13:0/20:4)   |         |               |               |       |       |      |        | 0.011         | 0.018(↓0.58)  | 0.007(↓0.54)  |        | 0.014  |              |               | 0.023(↑1.58) |              |              |              |       |  |  |  |
|                                                           | PC(14:0/20:5)   |         |               |               |       |       |      |        | 0.049         | 0.03(↓0.59)   |               |        |        |              |               | 0.043(↑1.37) |              |              |              |       |  |  |  |
|                                                           | PC(16:0/18:2)   |         |               |               |       |       |      |        | 0.01          | 0.025(↓0.67)  | 0.004(↓0.58)  |        | 0.024  |              |               | 0.01(↑1.54)  |              |              |              |       |  |  |  |
|                                                           | PC(18:0/16:1)   |         |               |               |       |       |      |        | 0.019         | 0.017(↓0.66)  | 0.016(↓0.66)  |        |        |              |               | 0.044(↑1.36) |              |              |              |       |  |  |  |
|                                                           | PC(16:0/20:4)   |         |               |               |       |       |      |        | 0.016         |               | 0.005(↓0.66)  |        | 0.019  |              |               | 0.01(↑1.38)  |              |              |              |       |  |  |  |
|                                                           | PC(16:0/22:5)   |         |               |               |       |       |      |        | 0.041         |               | 0.048(↓0.73)  |        |        |              |               | 0.044(↑1.24) |              |              |              |       |  |  |  |
|                                                           | PC(16:0/22:4)   |         |               |               |       |       |      |        | 0.023         | 0.032(↓0.71)  | 0.016(↓0.64)  |        |        |              |               | 0.05(↑1.23)  |              |              |              |       |  |  |  |
|                                                           | PC(20:4/20:5)   |         |               |               |       |       |      |        |               |               | 0.033(↓0.72)  |        | 0.038  |              |               | 0.016(↑1.39) |              |              |              |       |  |  |  |
|                                                           | PC(18:1/22:5)   |         |               |               |       |       |      |        |               | 0.05(↓0.75)   |               |        |        |              |               | 0.031(↑1.41) |              |              |              |       |  |  |  |
|                                                           | PS(16:1/22:2)   |         |               |               |       |       |      |        | 0.014         | 0.025(↓0.69)  | 0.008(↓0.6)   |        | 0.013  |              |               | 0.006(↑1.63) |              |              |              |       |  |  |  |
|                                                           | SM(d18:0/16:0)  |         |               |               |       | 0.046 |      |        | 0.005         | 0.017(↓0.5)   | 0.004(↓0.5)   |        |        |              |               |              |              |              |              |       |  |  |  |
|                                                           | PC(O-16:0/15:0) |         |               |               |       |       |      |        | 0.008         | 0.017(↓0.64)  | 0.006(↓0.6)   |        |        |              |               | 0.027        |              | 0.02(↓0.66)  |              |       |  |  |  |
|                                                           | PC(14:0/18:2)   |         |               |               |       |       |      |        |               | 0.021(↓0.69)  |               |        |        |              |               |              | 0.026(↓0.68) |              |              |       |  |  |  |
|                                                           | PC(16:0/16:1)   |         |               |               |       |       |      |        | 0.008         |               | 0.003(↓0.52)  |        |        |              |               | 0.043        |              | 0.014(↓0.55) |              |       |  |  |  |
|                                                           | PC(20:4/0:0)    |         |               |               |       |       |      |        |               |               |               |        | 0.005  |              | 0.006(↑6.29)  | 0.046(↑1.99) |              |              |              |       |  |  |  |
|                                                           | PC(19:0/22:6)   |         |               |               |       |       |      |        |               |               |               |        |        |              |               | 0.048(↑1.46) |              |              |              |       |  |  |  |
|                                                           | PE(20:3/20:4)   | 0.0002  | 0.005(↓0.57)  | 0.001(↓0.45)  |       |       |      |        | 0.033         | 0.023(↓0.65)  | 0.031(↓0.65)  |        |        |              |               |              |              |              |              |       |  |  |  |
|                                                           | PE(16:0/0:0)    |         |               |               |       |       |      |        | 0.046         | 0.027(↓0.4)   |               |        | 0.009  |              |               | 0.014(↑5.89) |              |              |              |       |  |  |  |
|                                                           | PE(18:0/18:2)   | 0.038   |               | 0.02(↓0.68)   |       |       |      |        | 0.004         | 0.006(↓0.58)  | 0.01(↓0.56)   |        |        |              |               |              |              |              |              |       |  |  |  |
|                                                           | LBPA(16:0/18:1) | 0.008   | 0.024(↓0.62)  | 0.012(↓0.54)  |       |       |      |        | 0.004         | 0.005(↓0.51)  | 0.016(↓0.56)  |        |        |              |               |              |              |              |              |       |  |  |  |
|                                                           | PC(P-16:0/20:3) |         |               | 0.012(↓0.71)  |       |       |      |        | 0.01          | 0.013(↓0.63)  | 0.01(↓0.58)   |        |        |              |               |              |              |              |              |       |  |  |  |
|                                                           | PA(22:0/22:6)   | 0.034   |               | 0.011(↓0.7)   |       |       |      |        | 0.011         | 0.015(↓0.63)  | 0.01(↓0.59)   |        |        |              |               |              |              |              |              |       |  |  |  |
|                                                           | PS(18:0/20:4)   |         | 0.001(↓0.57)  | 0.001(↓0.47)  |       |       |      |        | 0.004         | 0.019(↓0.6)   | 0.01(↓0.48)   |        |        |              |               |              |              |              |              |       |  |  |  |
|                                                           | PS(18:1/21:0)   | 0.015   |               | 0.009(↓0.7)   |       |       |      |        | 0.004         | 0.005(↓0.58)  | 0.01(↓0.59)   |        |        |              |               |              |              |              |              |       |  |  |  |
|                                                           | PC(P-20:0/18:2) | 0.011   | 0.017(↓0.72)  | 0.013(↓0.74)  |       |       |      |        | 0.007         | 0.005(↓0.59)  | 0.024(↓0.65)  |        |        |              |               |              |              |              |              |       |  |  |  |
|                                                           | PI(16:0/18:1)   | 0.008   | 0.025(↓0.57)  | 0.012(↓0.58)  |       |       |      |        | 0.027         | 0.018(↓0.6)   | 0.029(↓0.6)   |        |        |              |               |              |              |              |              |       |  |  |  |
|                                                           | PI(18:2/18:1)   | 0.024   |               | 0.022(↓0.56)  |       |       |      |        | 0.004         | 0.008(↓0.52)  | 0.01(↓0.41)   |        |        |              |               |              |              |              |              |       |  |  |  |
|                                                           | PI(18:2/18:0)   | 0.001   | 0.02(↓0.55)   | 0.002(↓0.44)  |       |       |      |        | 0.013         | 0.007(↓0.56)  | 0.048(↓0.66)  |        |        |              |               |              |              |              |              |       |  |  |  |
|                                                           | PI(P-18:0/17:0) | 0.011   |               | 0.006(↓0.56)  |       |       |      |        | 0.008         | 0.016(↓0.6)   | 0.012(↓0.53)  |        |        |              |               |              |              |              |              |       |  |  |  |
|                                                           | PI(18:0/20:4)   | 0.001   | 0.02(↓0.61)   | 0.003(↓0.48)  |       |       |      |        | 0.012         | 0.01(↓0.57)   | 0.017(↓0.56)  |        |        |              |               |              |              |              |              |       |  |  |  |
|                                                           | PI(20:4/0:0)    |         |               |               |       |       |      |        |               |               |               |        | 0.0206 |              | 0.036 (↑2.39) |              |              |              |              |       |  |  |  |
|                                                           | PE(18:2/16:1)   |         |               |               |       |       |      |        | 0.0334        |               | 0.01 (↓0.45)  |        |        |              |               |              |              |              |              |       |  |  |  |
|                                                           | PE(16:0/18:2)   |         |               |               |       |       |      |        | 0.0277        | 0.021 (↓0.6)  | 0.029 (↓0.61) |        |        |              |               |              |              |              |              |       |  |  |  |
|                                                           | PE(16:0/18:1)   |         |               |               |       |       |      |        | 0.0071        | 0.005 (↓0.54) | 0.032 (↓0.65) |        |        |              |               |              |              |              |              |       |  |  |  |
|                                                           | PE(P-16:0/20:4) |         |               |               |       |       |      |        |               |               |               |        |        |              |               |              |              |              |              |       |  |  |  |
|                                                           | PA(P-18:0/18:0) |         |               |               |       |       |      |        | 0.0038        | 0.005 (↓0.56) | 0.01 (↓0.53)  |        |        |              |               |              |              |              |              |       |  |  |  |
|                                                           | PE(18:2/18:2)   |         |               |               |       |       |      |        | 0.0188        | 0.011 (↓0.59) | 0.031 (↓0.62) |        |        |              |               |              |              |              |              |       |  |  |  |
|                                                           | PE(P-18:0/20:4) |         |               |               |       |       |      |        | 0.0047        | 0.005 (↓0.64) | 0.01 (↓0.58)  |        |        |              |               |              |              |              |              |       |  |  |  |
| PE(20:4/18:2)                                             |                 |         |               |               |       |       |      |        | 0.035 (↓0.64) |               |               |        |        |              |               |              |              |              |              |       |  |  |  |
| PE(18:2/20:3)                                             |                 |         |               |               |       |       |      | 0.0144 | 0.012 (↓0.62) | 0.018 (↓0.6)  |               |        |        |              |               |              |              |              |              |       |  |  |  |
| PE(18:0/20:4)                                             |                 |         |               |               |       |       |      | 0.0052 | 0.006 (↓0.59) | 0.01 (↓0.57)  |               |        |        |              |               |              |              |              |              |       |  |  |  |
| PG(18:1/18:2)                                             |                 |         |               |               |       |       |      | 0.0338 | 0.024 (↓0.67) | 0.028 (↓0.63) |               |        |        |              |               |              |              |              |              |       |  |  |  |
| PE(22:6/P-18:1)                                           |                 |         |               |               |       |       |      | 0.031  | 0.012 (↓0.64) | 0.037 (↓0.65) |               |        |        |              |               |              |              |              |              |       |  |  |  |
| PG(18:0/18:2)                                             |                 |         |               |               |       |       |      |        | 0.044 (↓0.69) | 0.047 (↓0.66) |               |        |        |              |               |              |              |              |              |       |  |  |  |
| PA(P-18:0/22:2)                                           |                 |         |               |               |       |       |      | 0.0123 | 0.011 (↓0.6)  | 0.015 (↓0.57) |               |        |        |              |               |              |              |              |              |       |  |  |  |
| PG(20:3/20:4)                                             | 0.0071          |         | 0.04 (↑1.4)   |               |       |       |      |        |               |               |               |        |        |              |               |              |              |              |              |       |  |  |  |
| PC(20:4/P-18:1)                                           |                 |         |               |               |       |       |      |        |               |               |               |        |        |              |               |              |              |              |              |       |  |  |  |
| PC(O-20:1/20:4)                                           |                 |         |               |               |       |       |      |        |               |               |               |        |        |              |               |              |              |              |              |       |  |  |  |
| PG(22:6/22:4)                                             |                 |         | 0.032 (↓0.75) |               |       |       |      |        |               |               |               |        |        |              |               |              |              |              |              |       |  |  |  |
| LysoPAF C-16                                              |                 |         |               |               |       |       |      |        |               |               |               | 0.0499 |        |              |               |              |              |              |              |       |  |  |  |
| PC(16:0/0:0)                                              |                 |         |               |               |       |       |      |        |               |               |               | 0.003  |        | 0.02 (↑3.86) | 0.004 (↑3.07) |              |              |              |              |       |  |  |  |
| PC(P-18:1/0:0)                                            |                 |         |               |               |       |       |      |        |               |               |               | 0.0181 |        |              | 0.011 (↑2.37) |              |              |              |              |       |  |  |  |
| FAHFA(16:1/5-O-16:0)                                      |                 |         |               |               |       |       |      | 0.0053 | 0.017 (↓0.56) | 0.003 (↓0.47) |               |        |        |              |               |              |              |              |              |       |  |  |  |
| PC(O-16:0/1:0)                                            |                 |         |               |               |       |       |      | 0.0141 |               |               |               |        |        |              |               |              |              |              |              |       |  |  |  |
| Lyso-PAF-C-18                                             |                 |         |               |               |       |       |      | 0.0349 | 0.049 (↓0.7)  | 0.038 (↓0.65) |               |        |        |              |               |              |              |              |              |       |  |  |  |
| PC(18:3/0:0)                                              |                 |         |               |               |       |       |      |        |               |               |               | 0.003  |        | 0.014 (↑3.6) | 0.004 (↑2.68) |              |              |              |              |       |  |  |  |
| PC(18:2/0:0)                                              |                 |         |               |               |       |       |      |        |               |               |               | 0.005  |        | 0.008 (7.32) |               |              |              |              |              |       |  |  |  |
| PC(18:0/0:0)                                              |                 |         |               |               |       |       |      |        |               |               |               | 0.0194 |        |              | 0.012 (↑2.31) |              |              |              |              |       |  |  |  |
| PC(20:5/0:0)                                              |                 |         |               |               |       |       |      |        |               |               |               | 0.0025 |        | 0.003 (6.85) | 0.047 (↑1.89) |              |              |              |              |       |  |  |  |
| PC(20:3/0:0)                                              |                 |         |               |               |       |       |      |        |               |               |               | 0.0252 |        |              | 0.015 (↑2.16) |              |              |              |              |       |  |  |  |
| PC(O-16:0/4:0)                                            |                 |         |               |               |       |       |      | 0.0053 |               | 0.003 (↓0.55) |               |        |        |              |               |              |              |              |              |       |  |  |  |
| DG(18:0/20:4/0:0)                                         |                 |         |               |               |       |       |      | 0.0053 | 0.017 (↓0.53) | 0.003 (↓0.43) |               |        |        |              |               |              |              |              |              |       |  |  |  |
| PC(12:0/16:0)                                             |                 |         |               |               |       |       |      |        |               |               |               | 0.0221 |        |              | 0.004 (↑1.61) |              |              |              |              |       |  |  |  |
| SM(d16:1/17:0)                                            |                 |         |               |               |       |       |      | 0.0053 | 0.017 (↓0.45) | 0.009 (↓0.51) |               |        |        |              |               |              |              |              |              |       |  |  |  |
| PC(O-16:0/13:0)                                           |                 |         |               |               |       |       |      | 0.006  | 0.017 (↓0.56) | 0.005 (↓0.54) |               |        |        |              |               |              |              |              |              |       |  |  |  |
| SM(d16:1/18:1)                                            |                 |         |               |               |       |       |      |        |               |               |               | 0.0169 |        |              | 0.008 (↑1.53) |              |              |              |              |       |  |  |  |
| PC(P-16:0/15:0)                                           |                 |         |               |               |       |       |      | 0.0053 | 0.017 (↓0.57) | 0.003 (↓0.5)  |               |        |        |              |               |              |              |              |              |       |  |  |  |
| PC(P-16:0/17:2)                                           |                 |         |               |               |       |       |      | 0.0053 | 0.017 (↓0.48) | 0.004 (↓0.41) |               |        |        |              |               |              |              |              |              |       |  |  |  |
| PC(O-16:0/17:2)                                           |                 |         |               |               |       |       |      | 0.0053 | 0.017 (↓0.62) | 0.003 (↓0.5)  |               |        |        |              |               |              |              |              |              |       |  |  |  |
| PC(16:1/18:2)                                             |                 |         |               |               |       |       |      | 0.0438 |               | 0.018 (↓0.66) |               |        |        |              |               |              |              |              |              |       |  |  |  |
| PC(17:2/18:0)                                             |                 |         |               |               |       |       |      | 0.0054 |               | 0.003 (↓0.56) |               |        |        |              |               |              |              |              |              |       |  |  |  |
| PC(O-15:0/20:4)                                           |                 |         |               |               |       |       |      | 0.0249 |               | 0.007 (↓0.61) |               |        |        |              |               |              |              |              |              |       |  |  |  |
| PC(P-18:0/17:2)                                           |                 |         |               |               |       |       |      | 0.0165 |               | 0.006 (↓0.58) |               |        |        |              |               |              |              |              |              |       |  |  |  |
| PC(16:0/20:3)                                             |                 |         |               |               |       |       |      | 0.0053 |               | 0.003 (↓0.59) |               |        |        |              |               |              |              |              |              |       |  |  |  |
| PC(18:0/18:2)                                             |                 |         |               |               |       |       |      | 0.0055 | 0.017 (↓0.63) | 0.004 (↓0.6)  |               |        |        |              |               |              |              |              |              |       |  |  |  |
| PC(17:1/19:0)                                             |                 |         |               |               |       |       |      | 0.0067 | 0.017 (↓0.63) | 0.012 (↓0.66) |               |        |        |              |               |              |              |              |              |       |  |  |  |
| PC(O-16:0/22:6)                                           |                 |         |               |               |       |       |      | 0.024  |               | 0.008 (↓0.66) |               |        |        |              |               |              |              |              |              |       |  |  |  |
| PC(20:3/P-18:1)                                           |                 |         |               |               |       |       |      | 0.0044 |               | 0.003 (↓0.61) |               |        |        |              |               |              |              |              |              |       |  |  |  |
| PC(18:2/20:5)                                             |                 |         |               |               |       |       |      | 0.0074 |               | 0.004 (↓0.61) |               |        |        |              |               |              |              |              |              |       |  |  |  |
| PC(18:0/20:3)                                             |                 |         |               |               |       |       |      | 0.0053 |               | 0.004 (↓0.56) |               |        |        |              |               |              |              |              |              |       |  |  |  |
| PC(P-18:0/22:6)                                           |                 |         |               |               |       |       |      | 0.0053 |               | 0.003 (↓0.51) |               |        |        |              |               |              |              |              |              |       |  |  |  |
| PC(18:0/19:1)                                             |                 |         |               |               |       |       |      |        |               |               |               | 0.0432 |        |              |               |              |              |              |              |       |  |  |  |
| PC(18:2/22:6)                                             |                 |         |               |               |       |       |      | 0.0391 |               |               |               |        |        |              |               |              |              |              |              |       |  |  |  |
| PC(18:0/22:4)                                             |                 |         |               |               |       |       |      |        |               |               |               |        |        |              |               |              |              |              |              |       |  |  |  |
