# Supplementary material for: Metabolomic Studies of Tissue Injury in Nonhuman Primates Exposed to Gamma-Radiation
Source: MDPI journal article supplement (doi:10.3390/ijms20133360), 2019-07-09
Supplement: s1 [file s1]

Supplementary table 1

| Metabolite                                                 | m/z      | Mass Error(ppm) | Retention Time(min) | Mode | CID Fragments                                                                                                                                                                      |
|------------------------------------------------------------|----------|-----------------|---------------------|------|------------------------------------------------------------------------------------------------------------------------------------------------------------------------------------|
| 3-Hydroxy-5-phenylpentanoic acid                           | 193.0875 | 3               | 3.87                | NEG  | 68.9931                                                                                                                                                                            |
| Xanthurenic Acid                                           | 204.0294 | 4               | 1.2                 | NEG  | 186.0191                                                                                                                                                                           |
| N-lactoyl-Phenylalanine                                    | 236.0933 | 3               | 3.74                | NEG  | 44.9982                                                                                                                                                                            |
| Abu-Gly-OH                                                 | 267.0634 | 4               | 0.43                | NEG  | 136.0506, 108.0213, 92.0251                                                                                                                                                        |
| PE(16:0/0:0)                                               | 452.2762 | 5               | 6.63                | NEG  | 255.23, 196.03, 152.99                                                                                                                                                             |
| 1-hexadecanoyl-sn-glycerol-3-phosphor-D-myo-inositol       | 571.2831 | 10              | 6.64                | NEG  | 255.23, 152.99                                                                                                                                                                     |
| 6-O-(1-O-stearoyl-sn-glycerol-3-phosphono)-1D-myo-inositol | 599.317  | 5               | 7.89                | NEG  | 283.26, 241.01, 152.99                                                                                                                                                             |
| PI(20:4/0:0)                                               | 619.2835 | 9               | 6.21                | NEG  | 315.04, 241.01, 152.99                                                                                                                                                             |
| PE(18:2/16:1)                                              | 712.4897 | 4               | 9.8                 | NEG  | 279.21, 253.21                                                                                                                                                                     |
| PE(16:0/18:2)                                              | 714.5055 | 3               | 9.9                 | NEG  | 452.27, 279.23, 255.23, 196.03, 152.99, 140.01                                                                                                                                     |
| PE(16:0/18:1)                                              | 716.518  | 8               | 9.94                | NEG  | 281.24, 255.23, 196.03, 140.01                                                                                                                                                     |
| PE(P-16:0/20:4)                                            | 722.5091 | 5               | 9.9                 | NEG  | 418.27, 303.23, 196.03, 152.99, 140.01                                                                                                                                             |
| PA(P-18:0/18:0)                                            | 723.5134 | 8               | 9.91                | NEG  | 152.99                                                                                                                                                                             |
| PE(18:2/18:2)                                              | 738.5053 | 4               | 9.85                | NEG  | 720.49, 279.23                                                                                                                                                                     |
| PE(18:0/18:2)                                              | 742.5366 | 4               | 9.93                | NEG  | 480.30, 462.29, 279.23, 196.03, 152.99, 140.01                                                                                                                                     |
| LBPA(16:0/18:1)                                            | 747.5188 | 1               | 9.89                | NEG  | 729.51, 417.24, 391.22, 281.24, 255.23, 152.99                                                                                                                                     |
| PE(P-18:0/20:4)                                            | 750.5384 | 8               | 9.97                | NEG  | 732.56, 464.31, 446.30, 303.23, 196.03, 140.01                                                                                                                                     |
| PE(20:4/18:2)                                              | 762.5053 | 3               | 9.8                 | NEG  | 303.23, 279.23                                                                                                                                                                     |
| PE(18:2/20:3)                                              | 764.519  | 6               | 9.85                | NEG  | 746.51, 728.52, 721.49, 305.24, 279.23, 196.03, 152.99, 140.01                                                                                                                     |
| PE(18:0/20:4)                                              | 766.5364 | 4               | 9.93                | NEG  | 748.52, 730.52, 723.51, 480.30, 303.23, 283.26, 196.03, 152.99, 140.01                                                                                                             |
| PG(18:1/18:2)                                              | 771.5216 | 4               | 9.89                | NEG  | 281.24, 279.23                                                                                                                                                                     |
| PE(22:6/P-18:1)                                            | 772.5271 | 2               | 9.88                | NEG  | 462.2990, 444.2884, 327.2330, 283.2431, 196.0380, 104.0118, 78.9591                                                                                                                |
| PG(18:0/18:2)                                              | 773.5313 | 3               | 9.89                | NEG  | 737.53, 699.50, 437.28, 419.25, 283.26, 279.23, 152.99                                                                                                                             |
| PA(P-18:0/22:2)                                            | 775.5368 | 6               | 9.9                 | NEG  | 739.51, 303.23, 152.99                                                                                                                                                             |
| PE(20:3/20:4)                                              | 788.5233 | 0               | 9.83                | NEG  | 770.50, 752.51, 305.24, 303.23                                                                                                                                                     |
| PC(P-16:0/20:3)                                            | 802.5569 | 6               | 9.88                | NEG  | 766.53, 752.55, 464.31, 305.24, 168.04                                                                                                                                             |
| PA(22:0/22:6)                                              | 803.5604 | 1               | 9.88                | NEG  | 767.54, 687.54, 327.23, 152.99, 78.95                                                                                                                                              |
| PS(18:0/20:4)                                              | 810.5223 | 8               | 12.02               | NEG  | 419.25, 152.99                                                                                                                                                                     |
| PG(20:3/20:4)                                              | 819.5168 | 2               | 9.81                | NEG  | 305.24, 303.23                                                                                                                                                                     |
| PC(20:4/P-18:1)                                            | 826.5567 | 6               | 9.81                | NEG  | 790.53, 776.54, 303.23, 168.04                                                                                                                                                     |
| PS(18:1/21:0)                                              | 830.5869 | 6               | 9.95                | NEG  | 812.57, 794.56, 743.54, 725.52, 417.24, 281.24, 152.99                                                                                                                             |
| PC(P-20:0/18:2)                                            | 832.5989 | 0               | 9.98                | NEG  | 814.58, 796.58, 279.23                                                                                                                                                             |
| PI(16:0/18:1)                                              | 835.5288 | 9               | 9.98                | NEG  | 281.24, 255.23, 241.01, 223.00, 152.99                                                                                                                                             |
| PC(O-20:1/20:4)                                            | 856.5962 | 4               | 9.94                | NEG  | 820.58, 806.58, 717.52, 699.50, 303.23                                                                                                                                             |
| PI(18:2/18:1)                                              | 859.5271 | 8               | 9.94                | NEG  | 281.24, 279.23, 241.01, 223.00, 152.99                                                                                                                                             |
| PI(18:2/18:0)                                              | 861.5459 | 5               | 9.99                | NEG  | 699.50, 599.31, 581.30, 283.26, 279.23, 241.01, 223.00, 152.99                                                                                                                     |
| PG(22:6/22:4)                                              | 869.532  | 2               | 9.8                 | NEG  | 851.56, 795.51, 715.51, 331.26, 327.23                                                                                                                                             |
| PI(P-18:0/17:0)                                            | 871.5432 | 5               | 9.92                | NEG  | 303.23, 152.99                                                                                                                                                                     |
| PI(18:0/20:4)                                              | 885.5466 | 4               | 9.96                | NEG  | 599.31, 581.30, 303.23, 283.26, 241.01, 223.00, 152.99                                                                                                                             |
| Choline                                                    | 104.108  | 9               | 0.38                | POS  | 60.0847                                                                                                                                                                            |
| Glutamate                                                  | 148.0608 | 2               | 0.4                 | POS  | 130.0545, 85.0285, 84.0446                                                                                                                                                         |
| Xanthine                                                   | 153.0414 | 5               | 0.43                | POS  | 136.0140, 135.0300, 110.0348, 82.0400, 55.0291                                                                                                                                     |
| Carnitine                                                  | 162.1136 | 6               | 0.4                 | POS  | 103.0394, 102.0920, 85.0291, 60.0819,                                                                                                                                              |
| 1,2-Dihydronaphthalene-1,2-diol                            | 163.0763 | 6               | 4.33                | POS  | 115.0542, 107.0491                                                                                                                                                                 |
| Phenylpyruvic acid                                         | 165.0555 | 6               | 0.42                | POS  | 91.0553                                                                                                                                                                            |
| Phenylalanine                                              | 166.0852 | 6               | 0.63                | POS  | 149.0587, 131.0484, 120.0806, 107.0485, 103.0537, 93.0702, 79.0548, 77.0392                                                                                                        |
| Valero-1,5-lactam                                          | 172.116  | 5               | 8.71                | POS  | 65.0403, 41.0379                                                                                                                                                                   |
| Choline Sulfate                                            | 184.0646 | 4               | 0.37                | POS  | 166.0530, 124.9900, 104.1070, 86.0964, 84.9641, 60.0808                                                                                                                            |
| 10-Oxo-8-decenoic acid                                     | 185.1158 | 7               | 3.15                | POS  | 69.0699                                                                                                                                                                            |
| 3-amino-2-naphthoic acid                                   | 188.071  | 2               | 1.17                | POS  | 170.0601, 142.0650, 115.0540                                                                                                                                                       |
| N6,N6,N6-Trimethyl-L-Lysine                                | 189.1616 | 10              | 0.36                | POS  | 130.0863, 84.0808, 60.0808                                                                                                                                                         |
| Acetylcarnitine                                            | 204.1239 | 4               | 0.41                | POS  | 145.0488, 85.0275                                                                                                                                                                  |
| (+)-propionylcarnitine                                     | 218.1403 | 7               | 0.45                | POS  | 218.1386, 159.0642, 85.0288, 60.0815, 44.0483                                                                                                                                      |
| 6,8,10,12-pentadecatetraenal                               | 219.1753 | 4               | 6.66                | POS  | 107.0860, 91.0542                                                                                                                                                                  |
| pro ile                                                    | 229.1557 | 5               | 0.42                | POS  | 70.0645                                                                                                                                                                            |
| isobutyrylcarnitine                                        | 232.1548 | 1               | 0.84                | POS  | 86.0964                                                                                                                                                                            |
| 2-methylbutyrylcarnitine                                   | 246.1704 | 1               | 2.02                | POS  | 187.0963, 85.0288, 60.0814, 57.0702                                                                                                                                                |
| palmitoleamide                                             | 254.2454 | 10              | 5.18                | POS  | 151.1480, 69.0699                                                                                                                                                                  |
| Palmitic amide                                             | 256.2637 | 0               | 7.8                 | POS  | 186.1829, 109.1007, 102.0914, 88.0758, 81.0694, 69.0691                                                                                                                            |
| Glycerophosphocholine                                      | 258.1096 | 2               | 0.39                | POS  | 184.0724, 166.0607, 124.9999, 104.1074, 86.0977                                                                                                                                    |
| 3-carboxy-4-methyl-5-pentyl-2-furanpropanoic acid          | 269.1366 | 7               | 3.31                | POS  | 181.0495                                                                                                                                                                           |
| C16 Sphinganine                                            | 274.2745 | 2               | 5.04                | POS  | 256.26                                                                                                                                                                             |
| Gamma-glutamylglutamic acid                                | 277.1016 | 5               | 0.4                 | POS  | 259.0925, 242.0659, 148.0604, 130.0499, 102.0550, 84.0444                                                                                                                          |
| Oleamide                                                   | 282.2798 | 2               | 9.99                | POS  | 149.1318, 121.0980, 81.0747, 69.0684, 57.0711                                                                                                                                      |
| Stearamide                                                 | 284.295  | 1               | 8.55                | POS  | 102.0918, 97.1003, 88.0755, 83.0854                                                                                                                                                |
| 12,13 EpOME                                                | 297.2406 | 6               | 7.39                | POS  | 69.0699, 57.0699                                                                                                                                                                   |
| Sphinganine                                                | 302.3051 | 1               | 5.72                | POS  | 284.2929, 43.0552                                                                                                                                                                  |
| Eicosapentaenoic acid                                      | 303.2305 | 4               | 7.53                | POS  | 397, 243.2062, 215.1327, 189.1625, 145.1045, 135.1170, 121.1007, 119.0859, 109.0990, 105.0646, 91.0546, 79.0542, 71.0466, 67.0557, 55.0554                                         |
| 3-oxo-nonadecanoic acid                                    | 313.2739 | 0               | 8.05                | POS  | 221.2260, 85.1012, 71.0855, 69.0699, 57.0699, 55.0542, 43.0542                                                                                                                     |
| 4,7,10,13,16,19-docosahexanoic acid                        | 329.247  | 1               | 7.82                | POS  | 396, 187.1447, 181.1012, 171.1152, 159.1156, 149.1296, 147.1158, 145.1006, 143.0850, 131.0852, 129.0694, 119.0854, 117.0698, 105.0701, 95.0862, 93.0703, 91.0545, 81.0704, 67.0548 |
| 13-Docosenamide                                            | 338.342  | 0               | 9.11                | POS  | 1982, 163.1446, 153.1270, 149.1307, 139.1104, 135.1148, 121.1000, 109.1009, 97.1004, 95.0854, 93.0704, 83.0860, 81.0701, 79.0548, 69.0705, 67.0530                                 |
| 2-oxo-heneicosanoic acid                                   | 341.3048 | 1               | 8.72                | POS  | 71.0855, 57.0699                                                                                                                                                                   |
| Adenosine 3'-monophosphate                                 | 348.0718 | 4               | 0.4                 | POS  | 136.0616, 119.0351, 97.0286                                                                                                                                                        |
| O-Arachidonoyl Glycidol (2AG)                              | 361.2727 | 2               | 6.2                 | POS  | 203.1785, 171.1154, 157.1008, 145.1001, 135.1159, 133.1006, 121.1008, 119.0852, 105.0700, 93.0700, 91.0544, 81.0701, 79.0545, 67.0546, 43.0551                                     |
| Linoleyl carnitine (C18:2)                                 | 424.3398 | 5               | 6.38                | POS  | 144.1020, 97.1012, 85.0284                                                                                                                                                         |
| C18:1                                                      | 426.3575 | 2               | 6.73                | POS  | 144.1020, 85.0284                                                                                                                                                                  |
| Stereoyl carnitine (C18:0)                                 | 428.3734 | 0               | 7.13                | POS  | 267.2680, 144.1020, 85.0284, 43.0542                                                                                                                                               |
| PC(13:0/0:0)                                               | 454.293  | 0               | 6.59                | POS  | 436.28, 258.11, 184.07, 166.06, 104.10, 86.09                                                                                                                                      |
| PC(P-15:0/0:0)                                             | 466.3287 | 1               | 7.55                | POS  | 448.31, 184.07, 104.10                                                                                                                                                             |
| PC(15:0/0:0)                                               | 482.3248 | 1               | 7.35                | POS  | 258.11, 184.07, 166.06, 104.10, 86.09                                                                                                                                              |
| LysoPAF-C-16                                               | 482.3601 | 0               | 6.79                | POS  | 184.0738, 166.0594, 124.9992, 104.1066, 86.0968, 60.0803                                                                                                                           |
| PC(16:0/0:0)                                               | 496.3402 | 1               | 6.61                | POS  | 478.32, 313.27, 258.11, 184.07, 166.06, 104.10, 86.09                                                                                                                              |
| PC(P-18:1/0:0)                                             | 506.3562 | 8               | 7.37                | POS  | 421.27, 341.30, 184.07, 166.06, 104.10, 86.09                                                                                                                                      |
| FAHFA(16:1/5-O-16:0)                                       | 509.4552 | 2               | 10.21               | POS  | 237.22, 163.14, 149.13, 135.11, 121.10, 107.08                                                                                                                                     |
| PC(O-16:0/1:0)                                             | 510.3552 | 0               | 6.96                | POS  | 184.07, 104.10                                                                                                                                                                     |
| Lyso-PAF-C-18                                              | 510.3887 | 6               | 7.59                | POS  | 184.0728, 124.9993, 104.1068, 86.0967, 43.0542                                                                                                                                     |
| PC(18:3/0:0)                                               | 518.3217 | 0               | 6.61                | POS  | 433.23, 258.11, 184.07, 166.06, 104.10, 86.09                                                                                                                                      |
| PC(18:2/0:0)                                               | 520.3402 | 0               | 6.23                | POS  | 337.27, 240.10, 184.07, 166.06, 104.10, 86.09                                                                                                                                      |
| PC(18:0/0:0)                                               | 524.3715 | 1               | 7.37                | POS  | 506.36, 421.27, 341.30, 258.11, 184.07, 166.06, 104.10, 86.09                                                                                                                      |
| PC(20:5/0:0)                                               | 542.3214 | 2               | 6.21                | POS  | 184.07, 166.06, 104.10, 86.09                                                                                                                                                      |
| PC(20:4/0:0)                                               | 544.3395 | 3               | 6.23                | POS  | 526.34, 361.27, 240.10, 184.07, 166.06, 104.10, 86.09                                                                                                                              |
| PC(20:3/0:0)                                               | 546.3541 | 1               | 7.36                | POS  | 461.26, 443.23, 258.11, 184.07, 166.06, 104.10, 86.09                                                                                                                              |
| PC(O-16:0/4:0)                                             | 552.3978 | 8               | 8.12                | POS  | 184.07                                                                                                                                                                             |
| PC(20:4/0:0)                                               | 566.3214 | 2               | 6.22                | POS  | 184.07                                                                                                                                                                             |
| PC(22:6/0:0)                                               | 568.3384 | 2               | 6.22                | POS  | 550.34, 483.24, 385.27, 240.10, 184.07, 166.06, 104.10, 86.09                                                                                                                      |
| PC(O-18:2/2:0)                                             | 582.3687 |                 | 6.62                | POS  | 184.07, 104.10                                                                                                                                                                     |
| 6-O-(1-O-stearoyl-sn-glycero-3-phosphono)-1D-myo-inositol  | 601.3323 | 4               | 7.92                | POS  | 565.31, 341.30                                                                                                                                                                     |
| DG(18:0/20:4/0:0)                                          | 645.5446 | 1               | 9.99                | POS  | 361.27, 341.30, 287.27, 283.27, 267.26                                                                                                                                             |
| SM(d18:1/14:0)                                             | 675.5417 | 3               | 9.66                | POS  | 184.07, 86.09                                                                                                                                                                      |
| PC(12:0/16:0)                                              | 678.5125 | 8               | 9.7                 | POS  | 478.32, 184.08, 166.06, 104.10, 86.09                                                                                                                                              |
| SM(d16:1/17:0)                                             | 689.5581 | 2               | 9.79                | POS  | 630.51, 184.08, 166.06, 104.10, 86.09                                                                                                                                              |
| SM(d18:1/14:0)                                             | 697.5213 | 3               | 9.65                | POS  | 638.45, 514.46, 184.07, 86.09                                                                                                                                                      |
| PC(O-16:0/13:0)                                            | 700.5312 | 9               | 9.94                | POS  | 504.34, 184.08                                                                                                                                                                     |
| SM(d16:1/18:1)                                             | 701.5571 | 3               | 9.7                 | POS  | 598.48, 184.07, 86.09                                                                                                                                                              |
| SM(d18:1/16:0)                                             | 703.574  | 1               | 9.88                | POS  | 618.51, 282.27, 184.08, 166.06, 104.10, 86.09                                                                                                                                      |
| SM(d18:0/16:0)                                             | 705.5803 | 14              | 9.89                | POS  | 184.08, 166.06, 104.10, 86.09                                                                                                                                                      |
| Butyl 4'-O-butanoyl-6-O-hexadecanoyl-neohesperidoside      | 713.4415 | 5               | 6.59                | POS  | 625.39, 497.34, 479.33                                                                                                                                                             |
| PC(13:0/18:2)                                              | 716.5269 | 6               | 9.9                 | POS  | 502.32, 184.08, 166.06, 104.10, 86.09                                                                                                                                              |
| PC(P-16:0/15:1)                                            | 724.5272 | 3               | 9.91                | POS  | 502.32, 184.08                                                                                                                                                                     |
| PC(P-16:0/15:0)                                            | 726.538  | 4               | 9.92                | POS  | 502.32, 184.08                                                                                                                                                                     |
| PC(O-16:0/15:0)                                            | 728.559  | 4               | 9.98                | POS  | 502.34, 184.08                                                                                                                                                                     |
| PC(14:0/18:2)                                              | 730.5427 | 6               | 9.75                | POS  | 520.34, 502.32, 184.08, 166.06, 104.10, 86.09                                                                                                                                      |
| PC(16:0/16:1)                                              | 732.5575 | 5               | 9.85                | POS  | 478.32, 239.23, 184.08, 166.06, 104.10, 86.09                                                                                                                                      |
| PC(14:0/18:0)                                              | 734.569  | 1               | 9.93                | POS  | 716.52, 524.36, 506.35, 267.26, 184.08, 166.06, 104.10, 86.09                                                                                                                      |
| PC(13:0/20:4)                                              | 740.5252 | 4               | 9.83                | POS  | 526.32, 184.08, 166.06, 104.10, 86.09                                                                                                                                              |
| PC(P-16:0/17:2)                                            | 750.5533 | 16              | 9.93                | POS  | 714.51, 502.32, 184.08                                                                                                                                                             |
| PC(14:0/20:5)                                              | 752.5144 | 10              | 6.59                | POS  | 184.07, 166.06, 104.10, 86.09                                                                                                                                                      |
| PC(O-16:0/17:2)                                            | 752.5585 | 3               | 9.96                | POS  | 504.34, 184.08                                                                                                                                                                     |
| PC(16:1/18:2)                                              | 756.5544 | 1               | 9.75                | POS  | 573.48, 520.34, 502.32, 184.08, 166.06, 104.10, 86.09                                                                                                                              |
| PC(16:0/18:2)                                              | 758.5693 | 0               | 9.85                | POS  | 722.55, 575.50, 520.33, 502.32, 496.33, 478.32, 184.08, 166.06, 104.10, 86.09                                                                                                      |
| PC(18:0/16:1)                                              | 760.583  | 3               | 9.91                | POS  | 742.56, 577.51, 524.36, 506.35, 267.26, 184.08, 166.06, 104.10, 86.09                                                                                                              |
| PC(17:2/18:0)                                              | 772.5892 | 5               | 9.91                | POS  | 589.51, 524.36, 506.35, 267.26, 184.08, 166.06, 104.10, 86.09                                                                                                                      |
| PC(O-15:0/20:4)                                            | 776.5588 | 3               | 9.91                | POS  | 184.08                                                                                                                                                                             |
| PC(P-18:0/17:2)                                            | 778.5659 | 8               | 9.9                 | POS  | 760.58, 576.50, 184.08                                                                                                                                                             |
| PC(16:0/20:4)                                              | 782.5694 | 0               | 9.8                 | POS  | 746.56, 599.50, 526.32, 496.33, 478.32, 239.23, 184.08, 166.06, 104.10, 86.09                                                                                                      |
| PC(16:0/20:3)                                              | 784.5826 | 3               | 9.84                | POS  | 766.53, 663.45, 601.51, 583.50, 496.33, 478.32, 239.23, 184.08, 166.06, 104.10, 86.09                                                                                              |
| PC(18:0/18:2)                                              | 786.5995 | 2               | 9.92                | POS  | 768.58, 750.54, 665.45, 603.53, 585.52, 524.36, 506.35, 502.32, 267.26, 263.23, 184.08, 166.06, 104.10, 86.09                                                                      |
| PC(17:1/19:0)                                              | 788.6103 | 8               | 9.95                | POS  | 788.60, 770.59, 667.52, 605.54, 587.54, 281.29, 184.08                                                                                                                             |
| PC(O-16:0/22:6)                                            | 79       |                 |                     |      |                                                                                                                                                                                    |
